# Supplementary material
Source: MDPI journal article supplement (https://www.mdpi.com/2076-3417/12/10/5189)
Supplement: s1 [file s1]

**Table S1.** Reports on some of the identified genomic regions linked with various agron-physiological, biochemical, root system architecture, and quality features in barley under salinity stress.

| Characteristic             | Marker        | Reference     | Characteristic                                | Marker       | Reference  |
|----------------------------|---------------|---------------|-----------------------------------------------|--------------|------------|
| Days to heading            | SSR/DArT      | [72,80]       | Root dry weight                               | SNP          | [45,82]    |
| Days to maturity           | SSR/SNP       | [72,80]       | Seedling root dry weight                      | SNP          | [45,82]    |
| Relative water content     | SSR           | [72]          | Salinity tolerance score                      | DArT         | [73,86]    |
| Chlorophyll content        | SSR/SNP       | [45,72]       | Germination percentage                        | SSR/DArT/SNP | [64,66,74] |
| Plant height               | SSR/DArT/SNP  | [45,72,80,82] | Germination pace                              | SNP          | [64]       |
| Spike length               | SSR/SNP       | [72,83]       | Seedling fresh weight                         | SSR/DArT/SNP | [45,64,85] |
| Biomass                    | SSR           | [72]          | Number of spike                               | SSR/DArT     | [75,84]    |
| Grain per spike            | SSR/SNP       | [72,83]       | Number of spikelet                            | SNP          | [83]       |
| Thousand grain weight      | SSR/DArT/SNP  | [72,80,83]    | Spike density                                 | SNP          | [83]       |
| Grain yield                | SSR/DArT/SNP  | [72,79,84,82] | Number of tillers                             | DArT/SNP     | [45,84]    |
| Harvest index              | SSR/DArT/SNP  | [72,80,82]    | O <sub>2</sub> - mature zone                  | SNP/DArT     | [78]       |
| Biomass                    | SSR/ DArT/SNP | [72,79,80]    | H <sub>2</sub> O <sub>2</sub> elongation zone | SNP/DArT     | [78]       |
| Na content                 | SSR/DArT/SNP  | [45,72,84,82] | Leaf damage score                             | SNP/DArT     | [87]       |
| K content                  | SSR/DArT/SNP  | [72,45,84,82] | Root and shoot Mg content                     | SNP          | [45]       |
| K/Na ratio                 | SSR/DArT/SNP  | [45,72,84]    | Root and shoot Ca content                     | SNP          | [45]       |
| Seedling leaf injury score | SNP           | [85]          | leaf temperature                              | SSR/DArT     | [81]       |
| Seedling shoot length      | SNP           | [64,77,85]    | transpiration rate                            | SSR/DArT     | [81]       |
| Root length                | SNP           | [64,77,85]    | leaf vapour pressure deficit                  | SSR/DArT     | [81]       |
| Number of leaves           | SNP           | [85]          | stomatal conductance                          | SSR/DArT     | [81]       |
| Seedling shoot dry weight  | SNP           | [74,85]       | intracellular CO <sub>2</sub> concentration   | SSR/DArT     | [81]       |

**Table S2.** Reports on the identified genomic regions linked with various agronomic, physiological, biochemical, root system architecture, and quality features in barley under water deficit stress.

| Characteristic                                                        | Marker   | Reference     | Characteristic                              | Marker           | Reference                    |
|-----------------------------------------------------------------------|----------|---------------|---------------------------------------------|------------------|------------------------------|
| Germination pace                                                      | SNP      | [113]         | Fructose content                            | SNP              | [114]                        |
| Germination percentage                                                | SNP      | [113]         | Sucrose content                             | SNP              | [114]                        |
| Shoot-to-root length ration                                           | SNP      | [108,113]     | Raffinose content                           | SNP              | [114]                        |
| Fresh weight                                                          | SNP      | [113]         | Maltose content                             | SNP              | [114]                        |
| Reduction of germination pace                                         | SNP      | [113]         | Ethylene content                            | SNP              | [114]                        |
| Reduction of germination percentage                                   | SNP      | [113]         | Superoxide dismutase activity               | SNP              | [114]                        |
| Reduction of root length                                              | SNP      | [113]         | Catalase activity                           | SNP              | [114]                        |
| Reduction of shoot length                                             | SNP      | [113]         | Peroxidase activity                         | SNP              | [114]                        |
| Reduction of fresh weight                                             | SNP      | [113]         | $\gamma$ -tocotrienol content               | SNP              | [114]                        |
| Root weight                                                           | SNP      | [108]         | $\alpha$ -tocotrienol content               | SNP              | [114]                        |
| Biomass                                                               | SNP      | [108]         | $\delta$ -tocopherol content                | SNP              | [114]                        |
| Number of main root                                                   | SNP      | [108]         | $\alpha$ -tocopherol content                | SNP              | [114]                        |
| Total root volume                                                     | SNP      | [108]         | $\beta$ -carotene content                   | SNP              | [114]                        |
| Total root length                                                     | SNP      | [108]         | Root features                               | SNP              | [112,115]                    |
| Shoot length                                                          | SNP      | [108]         | Malting quality                             | SNP/DArT         | [116]                        |
| Shoot dry weight                                                      | SNP      | [108]         | Days to heading                             | SNP/SSR/D<br>ArT | [75,105,111,117,<br>118]     |
| Free proline content                                                  | SNP      | [110,114]     | Grain filling period                        | SNP              | [119]                        |
| Glucose content                                                       | SNP      | [114]         | Days to maturity                            | SNP              | [105]                        |
| Grain protein                                                         | SNP      | [117]         | Intercellular $\text{CO}_2$ concentration   | SNP/DArT         | [104]                        |
| Polyphenol oxidase activity                                           | SNP      | [117]         | Stomatal conductivity                       | SNP/DArT         | [104]                        |
| Grain per spike                                                       | SNP      | [118]         | Quantum yield of $\text{CO}_2$ assimilation | SNP/DArT         | [104]                        |
| Number of spikes                                                      | SNP      | [106,118]     | Water use efficiency                        | SNP/DArT         | [104,109,114]                |
| Thousand kernel weight                                                | SNP/SSR  | [105,111,118] | Water content                               | SNP/DArT         | [33,104,114]                 |
| Performance index of energy trapped in PSII                           | SNP/DArT | [104]         | Relative water content                      | SNP/DArT         | [33,104,110,114]             |
| Photochemical light energy quenching coefficient                      | SNP/DArT | [104]         | Electrolyte leakage                         | SNP/DArT         | [104,114]                    |
| Quantum yield of electron transport in PSII                           | SNP/DArT | [104]         | Photosystem II efficiency                   | SNP              | [33]                         |
| Fluxes in the energy absorbed by PSII antennae                        | SNP/DArT | [104]         | Leaf greenness                              | SNP              | [33]                         |
| Excited leaf cross section                                            | SNP/DArT | [104]         | Plant height                                | SNP/SSR          | [120]                        |
| Excited leaf cross section                                            | SNP/DArT | [104]         | Peduncle length                             | SNP              | [103]                        |
| Fluxes in the energy trapped in PSII reaction centers                 | SNP/DArT | [104]         | Number of tillers                           | SNP              | [33,107,110]                 |
| Fluxes in the energy used for electron transport                      | SNP/DArT | [104]         | Biomass fresh                               | SNP              | [33]                         |
| Fluxes in the energy dissipated from PSII                             | SNP/DArT | [104]         | Biomass dry                                 | SNP              | [33,107,110,121]             |
| The maximum number of active reaction centers                         | SNP/DArT | [104]         | Harvest index                               | SNP              | [103,106,110]                |
| The overall PSII photochemical performance index for equal absorption | SNP/DArT | [104]         | Kernal weight (KW) per spike                | SNP              | [103,106]                    |
| Transpiration rate                                                    | SNP/DArT | [104,110]     | Spike length                                | SNP              | [103]                        |
| Net photosynthesis rate                                               | SNP/DArT | [104]         | Grain yield                                 | SNP/SSR/D<br>ArT | [75,105,111,117,<br>120,121] |

**Table S3.** List of studies that identified genomic regions linked with various agronomic, physiological, biochemical, root system architecture, and quality features in barley under low temperature stress.

| Characteristic              | Marker type | Temperature | References    |
|-----------------------------|-------------|-------------|---------------|
| Days to flowering           | SNP         | High        | [144]         |
| Chlorophyll content         | SNP         | High        | [144]         |
| Quantum yield of PS         | SNP/ STS    | Low         | [145–147]     |
| Electrolyte Leakage         | SNP         | Low         | [145,148]     |
| Biomass yield               | SNP         | High        | [149]         |
| Grain yield                 | SNP         | High        | [144,149]     |
| Leaf water content          | SNP         | High        | [144,149]     |
| Quantum yield of PS         | SNP         | High        | [149]         |
| Straw biomass               | SNP         | High        | [149]         |
| leaf temperature            | SNP         | High        | [149]         |
| relative leaf water content | SNP         | High        | [149]         |
| Glutathione                 | SNP         | High        | [149]         |
| Starch                      | SNP         | High        | [144,149]     |
| Succinate                   | SNP         | High        | [149]         |
| Glycine                     | SNP         | High        | [149]         |
| % $\alpha$ -Tocopherol      | SNP         | High        | [149]         |
| $\gamma$ -Tocopherol        | SNP         | High        | [149]         |
| Stay-green                  | DArT        | High        | [126]         |
| Proline content             | SNP         | High        | [144]         |
| Amino acids                 | SNP         | High        | [144]         |
| Vernalization response      | SNP/EST     | Low         | [142,143]     |
| Final leaf number           | SNP         | Low         | [150]         |
| Flowering time              | SNP         | Low         | [150]         |
| Freezing tolerance test     | SNP         | Low         | [143,144,150] |

**Table S4.** List of reports that identified genomic regions linked with various agronomic, physiological, biochemical, root system architecture, and quality features in barley under waterlogging stress.

| Characteristic              | Marker type  | References   |
|-----------------------------|--------------|--------------|
| Tolerance score             | DArT/SNP     | [78,173–176] |
| Root porosity               | DArT         | [173]        |
| Aerenchyma formation        | DArT/SNP     | [173,177]    |
| Root fresh and dry weights  | DArT/SSR     | [174]        |
| Shoot fresh and dry weights | DArT/SSR     | [174]        |
| Number of tillers           | DArT/SSR     | [174,177]    |
| Root length                 | DArT/SSR     | [174]        |
| Leaf chlorosis              | DArT/SSR     | [172]        |
| Plant biomass               | DArT/SSR/SNP | [172,176]    |
| Plant survival              | DArT/SSR     | [172,178]    |
| Plant healthiness           | DArT/SSR/SNP | [172,178]    |
| Plant height                | DArT/SNP     | [176,177]    |
| Grain yield                 | DArT/SNP     | [177]        |
| Number of spikes            | SNP          | [176]        |
| Number of grains            | SNP          | [176]        |
| Grain weight                | SNP          | [176]        |
| Chlorophyll content         | SNP          | [176]        |
| Carotenoid content          | SNP          | [176]        |
| ROS formation               | SNP          | [78]         |

**Table S5.** List of reports that identified genomic regions linked with various agronomic, physiological, biochemical, root system architecture, and quality features in barley under heavy metal stress.

| Trait                       | Marker type   | Metal | References |
|-----------------------------|---------------|-------|------------|
| Cd in roots (solution)      | SNP           | Cd    | [198]      |
| Cd in shoots (solution)     | SNP           | Cd    | [198]      |
| Cd translocation (solution) | SNP           | Cd    | [198]      |
| Cd in shoots (soil)         | SNP           | Cd    | [198]      |
| Leaf chlorosis              | DArT/SSR      | Mn    | [199]      |
| Plant height                | DArT/SSR/AFLP | Mn    | [199,200]  |
| Plant survival              | DArT/SSR      | Mn    | [199]      |
| Chlorophyll content         | DArT/SSR      | Mn    | [199]      |
| Root tolerance index        | EST           | Al    | [201]      |
| Zn in grain                 | SNP           | Zn    | [202]      |
| Cd in grain                 | SNP           | Cd    | [202]      |
| Fe in grain                 | SNP           | Fe    | [202]      |
| Spike length                | SSR/AFLP      | Mn    | [200]      |
| Awen length                 | SSR/AFLP      | Mn    | [200]      |
| Chlorophyll content         | GSB/SSR       | Mn/Cd | [1]        |
| Root length                 | GSB/SSR       | Mn/Cd | [1]        |
| Leaf POD                    | GSB/SSR       | Mn/Cd | [1]        |
| Root POD                    | GSB/SSR       | Mn/Cd | [1]        |
| Leaf APX                    | GSB/SSR       | Mn/Cd | [1]        |
| Plant height                | GSB/SSR       | Mn/Cd | [1]        |
| Cd in root                  | GSB/SSR       | Mn/Cd | [1]        |
| Mn in root                  | GSB/SSR       | Mn/Cd | [1]        |
| Cd in shoot                 | GSB/SSR       | Mn/Cd | [1,197]    |
| Leaf chlorosis and necrosis | SNP/RNAseq    | Cd    | [197]      |
